# 'Smoking Genes': A Genetic Association Study

Zoraida Verde<sup>1\*</sup>, Catalina Santiago<sup>1\*</sup>, José Miguel Rodríguez González-Moro<sup>2</sup>, Pilar de Lucas Ramos<sup>2</sup>, Soledad López Martín<sup>2</sup>, Fernando Bandrés<sup>3</sup>, Alejandro Lucia<sup>1\*¶</sup>, Félix Gómez-Gallego<sup>1¶</sup>

**1** Department of Biomedicine, Universidad Europea de Madrid, Villaviciosa de Odón, Comunidad de Madrid, Spain, **2** Department of Neumology, Hospital Gregorio Marañón, Madrid, Comunidad de Madrid, Spain, **3** Department of 'Aula de Estudios Avanzados', Fundación Tejerina, Madrid, Comunidad de Madrid, Spain

## Abstract

Some controversy exists on the specific genetic variants that are associated with nicotine dependence and smoking-related phenotypes. The purpose of this study was to analyse the association of smoking status and smoking-related phenotypes (included nicotine dependence) with 17 candidate genetic variants: *CYP2A6*\*1×2, *CYP2A6*\*2 (1799T>A) [rs1801272], *CYP2A6*\*9 (-48T>G) [rs28399433], *CYP2A6*\*12, *CYP2A13*\*2 (3375C>T) [rs8192789], *CYP2A13*\*3 (7520C>G), *CYP2A13*\*4 (579G>A), *CYP2A13*\*7 (578C>T) [rs72552266], *CYP2B6*\*4 (785A>G), *CYP2B6*\*9 (516G>T), *CHRNA3* 546C>T [rs578776], *CHRNA5* 1192G>A [rs16969968], *CNR1* 3764C>G [rs6928499], *DRD2-ANKK1* 2137G>A (*Taq1A*) [rs1800497], *5HTT* LPR, *HTR2A* -1438A>G [rs6311] and *OPRM1* 118A>G [rs1799971]. We studied the genotypes of the aforementioned polymorphisms in a cohort of Spanish smokers (*cases*, N = 126) and ethnically matched never smokers (*controls*, N = 80). The results showed significant between-group differences for *CYP2A6*\*2 and *CYP2A6*\*12 (both  $P < 0.001$ ). Compared with carriers of variant alleles, the odds ratio (OR) for being a non-smoker in individuals with the wild-type genotype of *CYP2A6*\*12 and *DRD2-ANKK1* 2137G>A (*Taq1A*) polymorphisms was 3.60 (95%CI: 1.75, 7.44) and 2.63 (95%CI: 1.41, 4.89) respectively. Compared with the wild-type genotype, the OR for being a non-smoker in carriers of the minor *CYP2A6*\*2 allele was 1.80 (95%CI: 1.24, 2.65). We found a significant genotype effect (all  $P \leq 0.017$ ) for the following smoking-related phenotypes: (i) cigarettes smoked per day and *CYP2A13*\*3; (ii) pack years smoked and *CYP2A6*\*2, *CYP2A6*\*1×2, *CYP2A13*\*7, *CYP2B6*\*4 and *DRD2-ANKK1* 2137G>A (*Taq1A*); (iii) nicotine dependence (assessed with the Fagestrom test) and *CYP2A6*\*9. Overall, our results suggest that genetic variants potentially involved in nicotine metabolism (mainly, *CYP2A6* polymorphisms) are those showing the strongest association with smoking-related phenotypes, as opposed to genetic variants influencing the brain effects of nicotine, e.g., through nicotinic acetylcholine (*CHRNA5*), serotonergic (*HTR2A*), opioid (*OPRM1*) or cannabinoid receptors (*CNR1*).

**Citation:** Verde Z, Santiago C, Rodríguez González-Moro JM, de Lucas Ramos P, López Martín S, et al. (2011) 'Smoking Genes': A Genetic Association Study. PLoS ONE 6(10): e26668. doi:10.1371/journal.pone.0026668

**Editor:** Gisela Nogales-Gadea, University Hospital Vall d'Hebron, Spain

**Received:** July 20, 2011; **Accepted:** September 30, 2011; **Published:** October 26, 2011

**Copyright:** © 2011 Verde et al. This is an open-access article distributed under the terms of the Creative Commons Attribution License, which permits unrestricted use, distribution, and reproduction in any medium, provided the original author and source are credited.

**Funding:** This study was supported by the UEM 03-2006 Internal Project of European University of Madrid and by the 035-2006 Project of The Spanish Lung Foundation (SEPAR). The funders had no role in study design, data collection and analysis, decision to publish, or preparation of the manuscript.

**Competing Interests:** The authors have declared that no competing interests exist.

\* E-mail: alejandro.lucia@uem.es

¶ These authors contributed equally to this work.

¶ These authors also contributed equally to this work.

## Introduction

Cigarette smoking is the single most preventable cause of lung cancer and a main source of morbimortality worldwide [1]. Smoking quit rates are low (~10% after 6 months) [2] and do not increase substantially with pharmacological treatment [2,3]. Further, long-term (i.e. years) abstinence following treatment is rare. Nicotine dependence is a main factor contributing to maintaining the harmful cigarette smoking behavior [4,5]. Thus, to identify the main causes of nicotine dependence and smoking-related phenotypes is of medical interest.

Evidence from classic studies on twins [6-10] and more recent molecular approaches including wide genome linkage studies [11-17] indicate that smoking-related phenotypes, particularly nicotine dependence are highly heritable (for a review, see [18,19]). More controversy exists on the specific genetic variants that have a functional significance on such phenotypes, with a strong rationale existing for polymorphisms in genes encoding nicotine-metabolizing enzymes in the liver [cytochrome P450 2A6 (*CYP2A6*) and B6 (*CYP2B6*)] and lungs (*CYP2A13*) [18]. Other candidate polymorphisms

are in genes encoding neuronal nicotinic acetylcholine receptors (*CHRNA3* and *CHRN5*), or in genes involved in dopaminergic, serotonergic, cannabinoid and opioid pathways related to nicotine reward and dependence, such as dopamine D<sub>2</sub> receptor/ankyrin repeat and kinase domain containing 1 (*DRD2/ANKK1* dopamine D<sub>2</sub>), serotonergic transporter [*5-HTT*, also termed solute carrier family 6, member 4 (*SLC6A4*)] and receptor (*HTR2A*), cannabinoid receptor 1 (*CNR1*) and mu opioid receptor (*OPRM1*) [18].

The purpose of this study was to assess the association of smoking status and smoking-related phenotypes (included nicotine dependence) with 17 candidate genetic variants: *CYP2A6*\*1×2, *CYP2A6*\*2 (1799T>A) [rs1801272], *CYP2A6*\*9 (-48T>G) [rs28399433], *CYP2A6*\*12, *CYP2A13*\*2 (3375C>T) [rs8192789], *CYP2A13*\*3 (7520C>G), *CYP2A13*\*4 (579G>A), *CYP2A13*\*7 (578C>T) [rs72552266], *CYP2B6*\*4 (785A>G), *CYP2B6*\*9 (516G>T), *CHRNA3* 546C>T [rs578776], *CHRNA5* 1192G>A [rs16969968], *CNR1* 3764C>G [rs6928499], *DRD2-ANKK1* 2137G>A (*Taq1A*) [rs1800497], *5HTT* LPR, *HTR2A* -1438A>G [rs6311] and *OPRM1* 118A>G [rs1799971]. We studied the genotypes of the aforementioned polymorphisms in a cohort of

Spanish smokers (*cases*) and ethnically-matched non-smokers (*controls*).

## Materials and Methods

### Participants

Written consent was obtained from each participant. The study protocol was approved by the institutional ethics committee (*Universidad Europea de Madrid* (UEM), Spain) and was in accordance with the Declaration of Helsinki for Human Research of 1974 (last modified in 2000).

A total of 206 individuals [all unrelated to each other and of the same Caucasian (Spanish) descent for 3 or more generations] enrolled in the study, including 126 smokers (*cases*, 64 male 62 female, mean age  $54 \pm 14$  years, range 20–84) and 80 never-smokers (*controls*, 37 male 43 female, mean age  $42 \pm 11$  years, range 24–66). In the smokers' group, 56 people were unhealthy smokers (diagnosed with lung cancer) and 70 were healthy at the time of the study. All cases met the following three criteria: 1) smoked more than 10 cigarettes per day at the time of the study, 2) had a smoking history of more than 10 packs per year and 3) had more than 3 scores in the Fagerstrom Test for Nicotine Dependence (see below). Participants in the control group were life-time never smokers who had taken at least one puff from a cigarette in their life-time without developing a pattern of regular smoking.

### Phenotype assessment

Nicotine dependence was assessed with the Fagerstrom Test for Nicotine Dependence (FTND) [20]. The FTND is a six-item questionnaire (score range 0–10) that is widely used to evaluate the severity of nicotine dependence. Regular smokers were divided in low-dependence (0–3 scores), medium-dependence (4–6 scores) and high-dependence smokers (7–10 scores) according to this scale.

Exposure to tobacco smoke (tobacco consumption) was assessed as self-reported cigarettes per day (CPD) in the last year and pack years smoked (PYS). The PYS is used to describe the number of cigarettes a person has smoked over a lifetime, e.g. 1 PYS is defined as 20 manufactured cigarettes (one pack) smoked per day for one year.

### Genotype assessment

During 2006–2009, we extracted blood leukocyte DNA from the participants using a standard phenol chloroform protocol and performed genotype analyses in the genetics laboratory of the *Universidad Europea de Madrid* (Spain). Our study followed recent recommendations for replicating genotype-phenotype association studies [21]: genotyping was performed specifically for research purposes, and the researchers in charge of genotyping were totally blinded to the participants' identities (blood samples were tracked solely with bar-coding and personal identities were only made available to the main study researcher who was not involved in actual genotyping).

All genotyping was conducted by polymerase chain reaction (PCR). Allele-specific PCR methods were applied for the detection of 5-*HIT*LPR. The PCR products were then analyzed directly by 1.2% agarose gel electrophoresis. Genotyping of *CYP2A6*\*12 and *CYP2A6*\*1 × 2 was performed by a nested PCR method according to previously described protocols [22,23]. The genotypes of *CYP2A13*\*2 [rs18192789], *CYP2A13*\*3, *CHRNA5* 1192G>A [rs16969968] and *HTR2A* -1438A>G [rs6311] were analyzed by PCR followed by Restriction Fragment Length Polymorphisms (RFLPs); the PCR products were digested with *HhaI*, *MspI*, *Taq<sup>II</sup>* and *MspI* respectively (New England Biolabs, Inc., Beverly, MA).

For all PCR-RFLP assays, the digested amplicons were separated on a 1.5% agarose ethidium bromide-stained gel. Genotyping of *CYP2A6*\*2 [rs1801272], *CYP2A6*\*9 [rs28399433], *CYP2A13* 579G>A, *CYP2A13* 578C>T [rs72552266], *CYP2B6*\*4 785A>G, *CYP2B6*\*9 516G>T and *CHRNA3* 546C>T [rs578776] were performed with the single-base extension (SBE) system (ABI Prism SNaPshot Multiplex Kit, Applied Biosystems, Foster City, CA).

For *OPRM1* 118A>G [rs1799971] and *DRD2-ANKK1* 2137G>A (*TaqIA*) [rs1800497] genotyping we used real-time PCR followed by melting curve analysis with fluorescence resonance energy transfer (FRET) probes with a thermal cycler (Light Cycler 2.0 IVD, Roche Diagnostics, Barcelona, Spain). Real-time PCR and Taqman probes were used to assess *CNR1* 3764C>G [rs6928499] with a Step One Real-Time PCR System (Applied Biosystems, Foster City, CA).

### Statistical analysis

The chi-squared ( $\chi^2$ ) test was used to assess deviations of genotype distribution from the Hardy-Weinberg equilibrium (HWE) in the whole study sample (*cases+controls*), and in the control group. We also compared mean values of smoking phenotypes (years smoking, CPD, FTND, PYS) between genders using the Student's unpaired *t* test. The level of significance was set at 0.05 for the two aforementioned analyses.

To compare smokers vs. non-smokers (*case:control study*), we used: (i) the  $\chi^2$  test for between-group comparisons of genotype frequencies, and (ii) logistic regression to calculate the odds ratio (OR) of being a non-smoker based on the studied polymorphisms. Between-group comparisons of genotype frequencies were corrected for multiple comparisons using the Bonferroni method, in which the threshold *P*-value is obtained by dividing 0.05 by the number of comparisons, i.e.  $n=17$ , corresponding to the 17 polymorphisms we studied (thus, threshold *P*-value = 0.003).

To assess genotype associations with smoking-related phenotypes within the smokers' group (*cohort study*), we used the ANOVA test to compare mean values of nicotine dependence (assessed with the FTND), CPD and PYS among the different genotypes of each polymorphism. The threshold *P*-value was obtained by dividing 0.05 by the number of comparisons for each polymorphism, i.e.  $n=3$ , corresponding to each genotype (thus, threshold *P*-value = 0.017).

All statistical analyses were performed with the PASW/SPSS Statistics 18.0 (SPSS Inc, Chicago, IL).

## Results

### Smoking phenotypes in cases (smokers)

The main values of smoking-related phenotypes in the smokers' group are shown in Table 1. Participants in this group showed a strong nicotine dependence and high levels of tobacco consumption; 66% of the total group were heavy smokers (CPD  $\geq 1$  pack/day) and 60% had medium-high nicotine dependence ( $\geq 4$  scores in the FTND). Women ( $46 \pm 11$  years) tended to be younger than men ( $61 \pm 12$  years) ( $P=0.129$ ); as such, they had been smoking for fewer years, and had lower values of CPD and PYS than men (all  $P<0.001$ ). The FTND score was similar in both genders ( $P=0.48$ ).

### Case-control study: Genotype comparisons between the two study groups

Genotype success in the whole study sample was 99.88%, with no failures observed in the smokers' group. All genotype distributions were in HWE in the whole study sample (*case+controls*) except for *CYP2A6*\*2 ( $P=0.001$ ), *CHRNA3* 546C>T ( $P=0.013$ ), *OPRM1* 118A>G ( $P=0.02$ ) and *DRD2-ANKK1*

**Table 1.** Main characteristics of the smokers' group.

| Smoking phenotypes | Men       | Women     | Total (men+women) | <i>P</i> for between-gender comparison |
|--------------------|-----------|-----------|-------------------|----------------------------------------|
| Years smoking      | 40.2±12.9 | 27.1± 8.4 | 33.7±12.7         | <b>&lt;0.001</b>                       |
| CPD                | 30.7±10.4 | 21.8± 8.1 | 26.5±10.0         | <b>&lt;0.001</b>                       |
| PYS                | 53.0±26.2 | 26.4±10.3 | 39.9±24.0         | <b>&lt;0.001</b>                       |
| FTND               | 5.7±2.2   | 6.0±2.0   | 5.8±2.1           | 0.48                                   |

Abbreviations: CPD, cigarettes per day; FTND, Fargstrom Test for Nicotine Dependence; PYS, pack years smoked (describes the number of cigarettes a person has smoked over long periods of time, e.g. 1 PYS = 20 cigarettes (one pack) smoked per day for one year). Significant *P*-values for between-gender comparisons are shown in bold.

Data are mean±SD.

doi:10.1371/journal.pone.0026668.t001

2137G>A (*Taq1A*) (*P*=0.02). In the control group, all genotype distributions were in HWE except for *CYP2A6*\*2 (*P*=0.02), *5-HTT* LPR (*P*=0.007) and *DRD2-ANKK1* 2137G>A (*Taq1A*) (*P*=0.02).

No between-gender differences were found for the whole study sample, except for *CYP2A6*\*1×2 and *DRD2-ANKK1* 2137G>A (data not shown).

Genotype frequency distributions in the two study groups are shown in Table 2. We found *P*-values below 0.05 for between-group comparisons in *CYP2A6*\*2, *CYP2A6*\*12, *CYP2A6*\*1×2, *CYP2A13*\*2, *CHRNA3* 546C>T, *DRD2-ANKK1* 2137G>A (*Taq1A*) and *5-HTT* LPR; yet, after adjustment for multiple comparisons statistical significance remained only for *CYP2A6*\*2 and *CYP2A6*\*12 (both *P*<0.001, and thus below the threshold *P*-value of 0.003). Compared

with carriers of variant alleles, the OR for being a non-smoker in individuals with the wild-type genotype of *CYP2A6*\*12 and *DRD2-ANKK1* 2137G>A (*Taq1A*) polymorphisms was 3.60 (95%CI: 1.75, 7.44) and 2.63 (95%CI: 1.41, 4.89) respectively. Compared with the wild-type genotype, the OR for being a non-smoker in carriers of the minor *CYP2A6*\*2 allele was 1.80 (95%CI: 1.24, 2.65). No other significant association was found.

#### Cohort study: Association between genetic polymorphism and smoking-related phenotypes within the smokers' group

After adjusting for multiple comparisons, the results of the ANOVA test showed a significant genotype effect for the following smoking-related phenotypes (Table 3, all *P*<0.017) (i) mean CPD

**Table 2.** Genotype frequency distributions (%) in the two study group, i.e. controls (non-smokers) and cases (smokers).

|                                            | Non-smokers |                   |      | Smokers |                   |      | <i>P</i> -value for between-group comparison |
|--------------------------------------------|-------------|-------------------|------|---------|-------------------|------|----------------------------------------------|
|                                            | M/M         | M/m               | m/m  | M/M     | M/m               | m/m  |                                              |
| <i>CYP2A6</i> *2                           | 58.8        | 27.5              | 13.7 | 87.2    | 12.0              | 0.8  | <b>&lt;0.001</b>                             |
| <i>CYP2A6</i> *9                           | 89.70       | 10.3              | 0.0  | 87.1    | 11.3              | 1.6  | 0.389                                        |
| <i>CYP2A6</i> *12                          | 75.0        | 25.0              | 0.0  | 45.4    | 42.0              | 12.6 | <b>&lt;0.001</b>                             |
| <i>CYP2A6</i> *1×2                         | 81.3        | 18.8 <sup>a</sup> | -    | 65.1    | 34.9 <sup>a</sup> | -    | 0.027                                        |
| <i>CYP2A13</i> *2                          | 87.5        | 12.5              | 0.0  | 96.7    | 3.3               | 0.0  | 0.017                                        |
| <i>CYP2A13</i> *3                          | 82.2        | 15.1              | 2.7  | 77.3    | 22.7              | 0.0  | 0.268                                        |
| <i>CYP2A13</i> *4                          | 98.5        | 1.5               | 0.0  | 97.5    | 2.5               | 0.0  | 0.548                                        |
| <i>CYP2A13</i> *7                          | 100.0       | 0.0               | 0.0  | 99.2    | 0.8               | 0.0  | 0.652                                        |
| <i>CYP2B6</i> *4                           | 70.0        | 25.0              | 5.0  | 61.5    | 25.6              | 12.8 | 0.132                                        |
| <i>CYP2B6</i> *9                           | 50.0        | 36.0              | 14.0 | 56.4    | 33.3              | 10.3 | 0.568                                        |
| <i>CHRNA3</i> 546C>T                       | 70.4        | 26.8              | 2.8  | 56.7    | 43.3              | 0.0  | 0.018                                        |
| <i>CHRNA5</i> 1192G>A                      | 32.3        | 47.7              | 20.0 | 34.4    | 53.8              | 11.8 | 0.316                                        |
| <i>5-HTT</i> LPR                           | 40.9        | 35.2              | 23.9 | 24.0    | 52.0              | 24.0 | 0.029                                        |
| <i>HTR2A</i> -1438A>G                      | 26.8        | 52.1              | 21.1 | 32.8    | 41.6              | 25.6 | 0.364                                        |
| <i>OPRM1</i> 118A>G                        | 74.0        | 24.6              | 1.4  | 67.5    | 24.7              | 7.8  | 0.143                                        |
| <i>DRD2-ANKK1</i> 2137G>A ( <i>Taq1A</i> ) | 66.7        | 22.7              | 10.6 | 43.2    | 42.4              | 14.4 | 0.007                                        |
| <i>CNR1</i> 3764C>G                        | 68.5        | 26.0              | 5.5  | 67.5    | 31.0              | 1.6  | 0.257                                        |

Abbreviations:

<sup>a</sup>M, major allele; m, minor allele.

Symbol: <sup>a</sup> frequency for M/m or m/m. See text for gene abbreviations. Between-group comparisons of genotype frequencies were corrected for multiple comparisons using the Bonferroni method, in which the threshold *P*-value is obtained by dividing 0.05 by the number of comparisons, i.e. n=17, corresponding to the 17 polymorphisms we studied (thus, threshold *P*-value = **0.003**). *P*-values below the threshold *P*-value are shown in bold.

doi:10.1371/journal.pone.0026668.t002

**Table 3.** Association between genotypes and smoking-related phenotypes.

|             | M/M       | M/m                    | M/M       | M/m                      | P            | M/M                      | M/m       | P                       | M/M       | M/m                     | P    | M/M                                  | M/m       | P                | M/M | M/m              | P |
|-------------|-----------|------------------------|-----------|--------------------------|--------------|--------------------------|-----------|-------------------------|-----------|-------------------------|------|--------------------------------------|-----------|------------------|-----|------------------|---|
|             |           | <i>CYP2A6*2</i>        |           | <i>CYP2A6*9</i>          |              | <i>CYP2A6*12</i>         |           | <i>CYP2A6*12</i>        |           | <i>CYP2A6*12</i>        |      | <i>CYP2A6*12</i>                     |           | <i>CYP2A6*12</i> |     | <i>CYP2A6*12</i> |   |
| <b>CPD</b>  | 25.6±10.0 | 31.1±11.5              | 40.0      | 24.7±8.5                 | 0.66         | 26.4±10.6                | 35.0±7.1  | 0.42                    | 26.6±10.8 | 27.2±10.7               | 0.87 | 24.9±10.1                            | 29.1±10.2 | 0.03             |     |                  |   |
| <b>PYS</b>  | 37.5±22.8 | 54.9±26.2              | 86.0      | 34.6±13.2                | <b>0.004</b> | 40.4±25.2                | 36.5±12.0 | 0.69                    | 39.4±25.3 | 39.9±22.7               | 0.96 | 32.8±18.3                            | 53.1±27.9 | <b>&lt;0.001</b> |     |                  |   |
| <b>FTND</b> | 5.9±2.1   | 5.3±2.2                | 3.0       | 7.1±1.9                  | 0.21         | 5.8±2.01                 | 2.5±0.7   | <b>0.005</b>            | 5.7±2.1   | 6.0±2.1                 | 0.58 | 6.1±2.1                              | 5.3±1.9   | 0.05             |     |                  |   |
|             |           | <i>CYP2A13*2</i>       |           | <i>CYP2A13*3</i>         |              | <i>CYP2A13*4</i>         |           | <i>CYP2A13*4</i>        |           | <i>CYP2A13*4</i>        |      | <i>CYP2A13*7</i>                     |           |                  |     |                  |   |
| <b>CPD</b>  | 26.8±10.5 | 23.8±7.5               | -         | 31.7±11.9                | 0.57         | 25.3±9.5                 | -         | <b>0.004</b>            | 26.8±10.4 | 20.0±10.0               | 0.20 | 26.5±10.4                            | 40.0      | 0.20             |     |                  |   |
| <b>PYS</b>  | 40.1±24.8 | 31.8±13.5              | -         | 46.4±28.1                | 0.51         | 38.0±23.3                | -         | 0.11                    | 40.5±24.4 | 13.7±5.1                | 0.06 | 39.2±23.8                            | 106.0     | <b>0.006</b>     |     |                  |   |
| <b>FTND</b> | 5.8±2.1   | 7.0±2.3                | -         | 6.0±1.9                  | 0.25         | 5.8±2.2                  | -         | 0.68                    | 5.8±2.1   | 6.7±2.1                 | 0.47 | 5.8±2.1                              | 8.0       | 0.30             |     |                  |   |
|             |           | <i>CYP2B6*4</i>        |           | <i>CYP2B6*9</i>          |              | <i>CHRNA3 1192G&gt;A</i> |           | <i>CHRNA5 546C&gt;T</i> |           | <i>CHRNA5 546C&gt;T</i> |      | <i>CHRNA5 546C&gt;T</i>              |           |                  |     |                  |   |
| <b>CPD</b>  | 25.7±10.1 | 27.5±11.2              | 28.7±10.6 | 26.2±10.0                | 0.51         | 26.2±10.0                | 27.8±10.7 | 0.60                    | 26.5±10.7 | 26.9±10.1               | 0.80 | 25.4±13.8                            | 24.8±9.3  | 0.034            |     |                  |   |
| <b>PYS</b>  | 34.9±19.8 | 41.5±26.7              | 57.5±32.1 | 35.6±19.6                | <b>0.004</b> | 35.6±19.6                | 42.2±26.9 | 0.07                    | 41.3±25.2 | 37.9±23.7               | 0.40 | 32.7±17.8                            | 37.8±24.2 | 0.14             |     |                  |   |
| <b>FTND</b> | 5.7±2.2   | 6.0±1.8                | 6.4±2.4   | 5.8±2.2                  | 0.44         | 5.8±2.2                  | 6.0±1.9   | 0.90                    | 5.7±2.1   | 5.9±2.1                 | 0.60 | 5.4±2.3                              | 5.9±2.0   | 0.68             |     |                  |   |
|             |           | <i>SH1TL LPR</i>       |           | <i>HTR2A -1438A&gt;G</i> |              | <i>OPRM1 118A&gt;G</i>   |           | <i>OPRM1 118A&gt;G</i>  |           | <i>OPRM1 118A&gt;G</i>  |      | <i>DRD2-ANKK1 2137G&gt;A (Taq1A)</i> |           |                  |     |                  |   |
| <b>CPD</b>  | 28.0±10.2 | 26.2±10.1              | 25.3±11.1 | 28.2±9.5                 | 0.36         | 28.2±9.5                 | 25.9±11   | 0.52                    | 26.9±9.8  | 23.0±11.5               | 0.03 | 27.5±9.4                             | 26.7±10.6 | 0.17             |     |                  |   |
| <b>PYS</b>  | 43.7±25.1 | 38.8±25.8              | 38.8±19.1 | 47.2±27.5                | 0.63         | 47.2±27.5                | 37.4±23.8 | 0.14                    | 40.6±23.6 | 34.4±23.1               | 0.13 | 47.9±26.9                            | 35.9±21.1 | <b>0.002</b>     |     |                  |   |
| <b>FTND</b> | 5.9±2.4   | 5.9±1.8                | 5.7±2.4   | 5.3±1.9                  | 0.93         | 5.3±1.9                  | 5.9±2.1   | 0.16                    | 5.8±2.1   | 6.0±2.0                 | 0.70 | 5.7±2.2                              | 5.7±2.1   | 0.278            |     |                  |   |
|             |           | <i>CNR1 3764C&gt;G</i> |           | <i>CNR1 3764C&gt;G</i>   |              | <i>CNR1 3764C&gt;G</i>   |           | <i>CNR1 3764C&gt;G</i>  |           | <i>CNR1 3764C&gt;G</i>  |      | <i>CNR1 3764C&gt;G</i>               |           |                  |     |                  |   |
| <b>CPD</b>  |           | 27.0±10.4              |           | 25.4±9.0                 |              | 25.4±9.0                 |           | 25.4±9.0                |           | 25.4±9.0                |      | 27.5±17.7                            |           | 0.70             |     |                  |   |
| <b>PYS</b>  |           | 38.4±22.77             |           | 42.3±26.5                |              | 42.3±26.5                |           | 42.3±26.5               |           | 42.3±26.5               |      | 55.0±35.3                            |           | 0.47             |     |                  |   |
| <b>FTND</b> |           | 5.9±2.2                |           | 5.7±1.7                  |              | 5.7±1.7                  |           | 5.7±1.7                 |           | 5.7±1.7                 |      | 2±0.0                                |           | 0.03             |     |                  |   |

Abbreviations: CPD, mean number of cigarettes smoked in one day; FTND, Fagerstrom Test Nicotine dependence test; M, major allele; m, minor allele; PYS, mean pack years smoked (see text for explanations). For each polymorphism, between-genotype comparisons were corrected for multiple comparisons using the Bonferroni method, where the threshold *P*-value is obtained by dividing 0.05 by the number of comparisons, i.e. *n*=3, corresponding to each genotype (thus, threshold *P*-value=0.017). *P*-values that were below the threshold *P*-value are shown in bold.

Data are shown as mean±SD values.  
doi:10.1371/journal.pone.0026668.t003

and *CYP2A13*\*3; (ii) PYS and *CYP2A6*\*2, *CYP2A6*\*1x2, *CYP2A13*\*7, *CYP2B6*\*4 and *DRD2-ANKK1* 2137G>A (*Taq1A*); (iii) nicotine dependence (FTND) and *CYP2A6*\*9.

## Discussion

Overall, our results suggest that genetic variants that can influence nicotine metabolism (mainly, *CYP2A6* polymorphisms) are those showing the strongest association with smoking status and smoking-related phenotypes. No significant association was observed for those genetic polymorphisms that are involved in the brain effects of nicotine through nicotinic acetylcholine (*CHRNA3*, *CHRNA5*), serotonergic (*HTR2A*), opioid (*OPRM1*) or cannabinoid receptors (*CNR1*) and serotonin transporters (*5HTT*). The only candidate polymorphism involved in the brain effects of nicotine that was associated with smoking status and with tobacco consumption (expressed as PYS) was *DRD2-ANKK1* 2137G>A (*Taq1A*).

The strongest genetic association we found in our study with smoking status and smoking-related phenotypes was for polymorphisms in *CYP2A6*, the gene encoding the principle nicotine C-oxidase [24]. Smokers who are partially or totally deficient in this enzyme owing to carriage of the variant allele of some *CYP2A6* polymorphisms are 'poor' (or 'slow') nicotine metabolizers; as such, they are theoretically expected to have a reduced need for cigarette consumption compared with the wild-type genotype [25,26]. However, it is also possible that *prolonged* high levels of brain nicotine owing to reduced metabolism might increase the risk for nicotine dependence, leading to a certain 'nicotine tolerance' phenomenon [27,28]. With regards to these considerations, it must be kept in mind that the decrease in enzyme activity is considerably more marked with carriage of the *CYP2A6*\*2 allele than with the *CYP2A6*\*12 variant. Thus, \*2 allele-carriers, who are 'null-slow' rather than 'intermediate metabolizers' could experience a phenomenon of 'nicotine tolerance' with high cigarette consumption (>20 CPD) early in their smoking lifetime [27]. In other words, smokers with the *CYP2A6*\*2 allele might experiment more negative effects when they start to become smokers; but when they continue smoking they may experience prolonged nicotine levels in the brain, thereby becoming more rapidly tolerant and thus needing to smoke more [29]. Our findings are consistent with the aforementioned biological implications of *CYP2A6*\*12 and *CYP2A6*\*2 variants. First, both *CYP2A6*\*2 and *CYP2A6*\*12 polymorphisms were strongly associated with smoking status, yet the variant \*2 and \*12 alleles were underrepresented and overrepresented respectively in smokers. Second, the *CYP2A6*\*2 variation, but not the *CYP2A6*\*12 polymorphism was associated with smoking phenotypes within the smokers' group, with those individuals homozygous for the \*2 allele showing the highest levels of long-term cigarette consumption (PYS). On the other hand, carriage of the *CYP2A6*\*1x2 duplication allele, leading to faster nicotine metabolism was also associated with higher PYS. Our results are in overall agreement with those reported by Rao *et al*, who showed that individuals with the duplication allele *CYP2A6*\*1x2 had higher nicotine consumption [23].

Regarding those genes involved in the central effects of nicotine, we only found a significant association for *DRD2-ANKK1* (*Taq1A*). The variant A1 allele: (i) was associated with an increased chance of being a non-smoker, (ii) tended to be overrepresented in non-smokers compared with smokers (yet the between-group comparison did not withstand statistical correction for multiple comparisons), and (iii) positively associated with PYS in smokers. There is controversy in the literature: previous studies suggested and

association of the A1 allele with susceptibility to smoking [30] but more recent studies failed to replicate such association. The *DRD2-ANKK1* gene is involved in the nicotine effects through dopaminergic pathways, with the variant A1 allele being associated with lower density of dopaminergic receptors (*DRD2*) in the striatum [30–32]. Our findings might indeed suggest that people with a functional deficit in the dopamine reward pathway do not experience a reward with smoking initiation, which might confer a protective role to the A1 allele against smoking initiation. However, once they have become smokers, A1-carriers might need to consume more nicotine to enhance the dopaminergic system [30,33]. This might explain why the A1 allele was positively associated with PYS in our smokers' group.

A novelty of our study stems from the fact that we analyzed the association of the *HTR2A*-1438A>G polymorphism with smoking status and all smoking-related phenotypes, including nicotine dependence. The serotonergic system could theoretically be implicated in habitual smoking because nicotine increases brain serotonin secretion and nicotine withdrawal has the opposite effect [34,35]. Polina *et al* found a higher frequency of the variant A allele in European-derived Brazilian smokers than in their non-smoking controls [35]. However, our results do not provide evidence for an association between *HTR2A* -1438A>G and smoking status. Reasons for disparity between the findings reported by Polina *et al* and the present ones might lie, at least partly, in the different ethnic background of the two study cohorts. Notably, the frequency of the A allele was considerably lower in their non-smoking controls (40%) compared with ours (53.6%).

On the other hand, we found no association for those genetic polymorphisms that are involved in the brain effects of nicotine through nicotinic acetylcholine (*CHRNA3*, *CHRNA5*), serotonergic (*HTR2A*), opioid (*OPRM1*), cannabinoid receptors (*CNR1*) or serotonin transporters (*5HTT*). Some studies reported a significant association between the aforementioned variants and nicotine dependence [35–39] while others failed to corroborate such association [40–43]. A marked racial/ethnic diversity exists in smoking behavior and smoking-related phenotypes (such as age of smoking initiation, smoking rate or level of dependence), as well as in the genotype frequencies of the functional polymorphisms we studied here [44,45], which could explain, at least partly, differences between studies.

We believe there are several novelties and strengths in our design. This the first association study in the field that takes into account the most important polymorphisms that are strong candidates to influence smoking behavior, i.e. those involved in nicotine metabolism, as well as in the brain effects of nicotine. The results of our study are overall valid, as all the following criteria were met [46]: the studied phenotypes (smoking status and smoking-related phenotypes) were properly defined and accurately recorded by a researcher who was blind to the genetic information; both groups (smokers and non-smokers) were ethnically matched; genotype assessment was unbiased and accurate; we adjusted all statistical inferences for multiple comparisons; and the results are overall consistent with previous research in the field [45,47]. A weakness of our study was the low sample size of both cohorts, yet we believe this can be partly overcome by the fact that both cohorts were homogeneous and well defined in terms of phenotype assessment.

In conclusion, our results suggest that genetic variants potentially involved in nicotine metabolism (mainly, *CYP2A6* polymorphisms) are those showing the strongest association with smoking status and smoking-related phenotypes, as opposed to most genetic variants that can influence the brain effects of nicotine, except for the *DRD2-ANKK1* 2137G>A polymorphism.

We believe studies as the present ones might help understanding the role of genetics in smoking behavior and on potential smoking cessation, and to better focus therapeutic approaches based on the knowledge of each individual's genetic predisposition to smoking.

## References

- Murray S (2006) A smouldering epidemic. *CMAJ* 174(3): 309–310.
- Hughes JR, Stead LF, Lancaster T (2007) Antidepressants for smoking cessation. *Cochrane Database Syst Rev*;1.
- Silagy C, Lancaster T, Stead L, Mant D, Fowler G (2002) Nicotine replacement therapy for smoking cessation. *Cochrane Database Syst Rev*;4.
- Xian H, Scherrer JF, Eisen SA, Lyons MJ, Tsuang M, et al. (2007) Nicotine dependence subtypes: Association with smoking history, diagnostic criteria and psychiatric disorders in 5440 regular smokers from the vietnam era twin registry. *Addict Behav* 32(1): 137–147.
- John U, Meyer C, Hapke U, Rumpf HJ, Schumann A (2004) Nicotine dependence, quit attempts, and quitting among smokers in a regional population sample from a country with a high prevalence of tobacco smoking. *Prev Med* 38(3): 350–358.
- Carmelli D, Swan GE, Robinette D, Fabsitz R (1992) Genetic influence on smoking—a study of male twins. *N Engl J Med* 327(12): 829–833.
- Kendler KS, Thornton LM, Pedersen NL (2000) Tobacco consumption in swedish twins reared apart and reared together. *Arch Gen Psychiatry* 57(9): 886–892.
- Li MD, Cheng R, Ma JZ, Swan GE (2003) A meta-analysis of estimated genetic and environmental effects on smoking behavior in male and female adult twins. *Addiction* 98(1): 23–31.
- Lessov CN, Martin NG, Statham DJ, Todorov AA, Slutske WS, et al. (2004) Defining nicotine dependence for genetic research: Evidence from australian twins. *Psychol Med* 34(5): 865–879.
- Broms U, Silventoinen K, Madden PA, Heath AC, Kaprio J (2006) Genetic architecture of smoking behavior: A study of finnish adult twins. *Twin Res Hum Genet* 9(1): 64–72.
- Bierut IJ, Madden PA, Breslau N, Johnson EO, Hatsukami D, et al. (2007) Novel genes identified in a high-density genome wide association study for nicotine dependence. *Hum Mol Genet* 16(1): 24–35.
- Saccone SF, Hinrichs AL, Saccone NL, Chase GA, Konvicka K, et al. (2007) Cholinergic nicotinic receptor genes implicated in a nicotine dependence association study targeting 348 candidate genes with 3713 SNPs. *Hum Mol Genet* 16(1): 36–49.
- Uhl GR, Liu QR, Drgon T, Johnson C, Walther D, et al. (2007) Molecular genetics of nicotine dependence and abstinence: Whole genome association using 520,000 SNPs. *BMC Genet* 8: 10.
- Thorgeirsson TE, Geller F, Sulem P, Rafnar T, Wiste A, et al. (2008) A variant associated with nicotine dependence, lung cancer and peripheral arterial disease. *Nature* 452(7187): 638–642.
- Uhl GR, Liu QR, Drgon T, Johnson C, Walther D, et al. (2008) Molecular genetics of successful smoking cessation: Convergent genome-wide association study results. *Arch Gen Psychiatry* 65(6): 683–693.
- Drgon T, Johnson C, Walther D, Albino AP, Rose JE, et al. (2009) Genome-wide association for smoking cessation success: Participants in a trial with adjunctive dencotinized cigarettes. *Mol Med* 15(7-8): 268–274.
- Drgon T, Montoya I, Johnson C, Liu QR, Walther D, et al. (2009) Genome-wide association for nicotine dependence and smoking cessation success in NIH research volunteers. *Mol Med* 15(1-2): 21–27.
- Lerman CE, Schnoll RA, Munafò MR (2007) Genetics and smoking cessation improving outcomes in smokers at risk. *Am J Prev Med* 33(6 Suppl): S398–405.
- Lessov-Schlaggar CN, Pergadia ML, Khroyan TV, Swan GE (2008) Genetics of nicotine dependence and pharmacotherapy. *Biochem Pharmacol* 75(1): 178–195.
- Fagerstrom KO, Schneider NG (1989) Measuring nicotine dependence: A review of the fagerstrom tolerance questionnaire. *J Behav Med* 12(2): 159–182.
- NCI-NHGRI Working Group on Replication in Association Studies, Chanock SJ, Manolio T, Boehnke M, Boerwinkle E, et al. (2007) Replicating genotype-phenotype associations. *Nature* 447(7145): 655–660.
- Schoedel KA, Hoffmann EB, Rao Y, Sellers EM, Tyndale RF (2004) Ethnic variation in CYP2A6 and association of genetically slow nicotine metabolism and smoking in adult caucasians. *Pharmacogenetics* 14(9): 615–626.
- Rao Y, Hoffmann E, Zia M, Bodin L, Zeman M, et al. (2000) Duplications and defects in the CYP2A6 gene: Identification, genotyping, and in vivo effects on smoking. *Mol Pharmacol* 58(4): 747–755.
- Oscarsen M (2001) Genetic polymorphisms in the cytochrome P450 2A6 (CYP2A6) gene: Implications for interindividual differences in nicotine metabolism. *Drug Metab Dispos* 29(2): 91–95.
- Pianezza ML, Sellers EM, Tyndale RF (1998) Nicotine metabolism defect reduces smoking. *Nature* 393(6687): 750.
- Malaiyandi V, Lerman C, Benowitz NL, Jepsen C, Patterson F, et al. (2006) Impact of CYP2A6 genotype on pretreatment smoking behaviour and nicotine levels from and usage of nicotine replacement therapy. *Mol Psychiatry* 11(4): 400–409.
- Malaiyandi V, Sellers EM, Tyndale RF (2005) Implications of CYP2A6 genetic variation for smoking behaviors and nicotine dependence. *Clin Pharmacol Ther* 77(3): 145–158.
- Pomerleau OF (1995) Individual differences in sensitivity to nicotine: Implications for genetic research on nicotine dependence. *Behav Genet* 25(2): 161–177.
- O'Loughlin J, Paradis G, Kim W, DiFranza J, Meshefedjian G, et al. (2004) Genetically decreased CYP2A6 and the risk of tobacco dependence: A prospective study of novice smokers. *Tob Control* 13(4): 422–428.
- Noble EP, Sydulko K, Fitch RJ, Ritchie T, Bohlman MC, et al. (1994) D2 dopamine receptor TaqI A alleles in medically ill alcoholic and nonalcoholic patients. *Alcohol Alcohol* 29(6): 729–744.
- Pohjalainen T, Rinne JO, Nagren K, Lehtikoinen P, Anttila K, et al. (1998) The A1 allele of the human D2 dopamine receptor gene predicts low D2 receptor availability in healthy volunteers. *Mol Psychiatry* 3(3): 256–260.
- Johnstone E, Benowitz N, Cargill A, Jacob R, Hinks L, et al. (2006) Determinants of the rate of nicotine metabolism and effects on smoking behavior. *Clin Pharmacol Ther* 80(4): 319–330.
- Munafò MR, Johnstone EC, Murphy MF, Aveyard P (2009) Lack of association of DRD2 rs1800497 (TaqI A) polymorphism with smoking cessation in a nicotine replacement therapy randomized trial. *Nicotine Tob Res* 11(4): 404–407.
- Ribeiro EB, Bettiker RL, Bogdanov M, Wurtman RJ (1993) Effects of systemic nicotine on serotonin release in rat brain. *Brain Res* 621(2): 311–318.
- Polina ER, Contini V, Hutz MH, Bau CH (2009) The serotonin 2A receptor gene in alcohol dependence and tobacco smoking. *Drug Alcohol Depend* 101(1-2): 128–131.
- Bierut IJ, Stitzel JA, Wang JC, Hinrichs AL, Grucza RA, et al. (2008) Variants in nicotinic receptors and risk for nicotine dependence. *Am J Psychiatry* 165(9): 1163–1171.
- Chen X, Williamson VS, An SS, Hettema JM, Aggen SH, et al. (2008) Cannabinoid receptor 1 gene association with nicotine dependence. *Arch Gen Psychiatry* 65(7): 816–824.
- Perkins KA, Lerman C, Grottenhaler A, Ciccocioppo MM, Milanak M, et al. (2008) Dopamine and opioid gene variants are associated with increased smoking reward and reinforcement owing to negative mood. *Behav Pharmacol* 19(5-6): 641–649.
- Nilsson KW, Oreland L, Kronstrand R, Leppert J (2009) Smoking as a product of gene-environment interaction. *Ups J Med Sci* 114(2): 100–107.
- Lerman C, Shields PG, Audrain J, Main D, Cobb B, et al. (1998) The role of the serotonin transporter gene in cigarette smoking. *Cancer Epidemiol Biomarkers Prev* 7(3): 253–255.
- Terayama H, Itoh M, Fukunishi I, Iwashita K (2004) The serotonin-2A receptor polymorphism and smoking behavior in japan. *Psychiatr Genet* 14(4): 195–197.
- Zhang L, Kendler KS, Chen X (2006) The mu-opioid receptor gene and smoking initiation and nicotine dependence. *Behav Brain Funct* 2: 28.
- Maes HH, Neale MC, Chen X, Chen J, Prescott CA, et al. (2011) A twin association study of nicotine dependence with markers in the CHRNA3 and CHRNA5 genes. *Behav Genet*. 10 p.
- Kandel DB, Kiros GE, Schaffran C, Hu MC (2004) Racial/ethnic differences in cigarette smoking initiation and progression to daily smoking: A multilevel analysis. *Am J Public Health* 94(1): 128–135.
- Wang J, Li MD (2010) Common and unique biological pathways associated with smoking initiation/progression, nicotine dependence, and smoking cessation. *Neuropsychopharmacology* 35(3): 702–719.
- Attia J, Ioannidis JP, Thakkinstian A, McEvoy M, Scott RJ, et al. (2009) How to use an article about genetic association: B: Are the results of the study valid? *JAMA* 301(2): 191–197.
- Quaak M, van Schayck CP, Knaapen AM, van Schooten FJ (2009) Genetic variation as a predictor of smoking cessation success. A promising preventive and intervention tool for chronic respiratory diseases? *Eur Respir J* 33(3): 468–480.

## Author Contributions

Conceived and designed the experiments: CS ZV FG-G. Performed the experiments: ZV CS. Analyzed the data: ZV AL. Contributed reagents/materials/analysis tools: FG-G FB. Wrote the paper: AL ZV. Phenotype assessment: JMRG-M PdLR SLM.
